# Supplementary material
Source: PubMed Central journal article supplement (PMC9403853)

## Supplemental Online Content

Harris KM, Nienaber CA, Peterson MD, et al. Early mortality in type A acute aortic dissection: insights from the International Registry of Acute Aortic Dissection. *JAMA Cardiol*. Published online August 24, 2022. doi:10.1001/jamacardio.2022.2718

**eTable 1.** Presenting signs and symptoms

**eTable 2.** Imaging studies

**eTable 3.** Key differences between surgically managed patients and those who died waiting

**eTable 4.** Cox proportional hazard analysis for patients who died awaiting surgery

**eFigure 1.** Survival between early and later years separated by management type

**eFigure 2.** Time to surgery

This supplemental material has been provided by the authors to give readers additional information about their work.

eTable 1. Presenting signs and symptoms

|                                | Intended Surgery  | Medical Management | p-value |
|--------------------------------|-------------------|--------------------|---------|
| Abrupt onset pain              | 3713/4395 (84.5%) | 305/395 (77.2%)    | <0.001  |
| Severe or worst/ever pain      | 3365/3667 (91.8%) | 267/303 (88.1%)    | 0.029   |
| Chest pain                     | 4111/4826 (85.2%) | 315/430 (73.3%)    | <0.001  |
| Head or neck pain              | 1104/3941 (28.0%) | 72/369 (19.5%)     | <0.001  |
| Back pain                      | 1833/4118 (44.5%) | 188/403 (46.7%)    | 0.410   |
| Abdominal pain                 | 1006/4001(25.1%)  | 119/387 (30.7%)    | 0.016   |
| Syncope                        | 739/4192 (17.6%)  | 78/398 (19.6%)     | 0.326   |
| Presenting hypotensive         | 746/4725 (15.8%)  | 71/447 (15.9%)     | 0.958   |
| Presenting shock               | 494/4725 (10.5%)  | 46/447 (10.3%)     | 0.914   |
| Presenting AI§                 | 1150/3617 (31.8%) | 71/375 (18.9%)     | <0.001  |
| Pulse deficits present         | 964/2775 (34.7%)  | 88/293 (30.0%)     | 0.107   |
| Pericardial friction rub       | 67/3827 (1.8%)    | 3/400 (0.8%)       | 0.136   |
| Ischemic peripheral neuropathy | 253/4069 (6.2%)   | 10/407 (2.5%)      | 0.002   |
| Ischemic spinal cord damage    | 47/4020 (1.2%)    | 7/399 (1.8%)       | 0.310   |
| Signs of CVA                   | 369/4260 (8.7%)   | 45/413 (10.9%)     | 0.127   |
| Ischemic lower extremity       | 499/4122 (12.1%)  | 36/409 (8.8%)      | 0.048   |
| Coma/altered consciousness     | 395/4170 (9.5%)   | 80/415 (19.3%)     | <0.001  |
| Congestive heart failure       | 311/4197 (7.4%)   | 44/415 (10.6%)     | 0.020   |

§AI: aortic insufficiency, ||CVA: cerebrovascular accident

eTable 2. Imaging studies

|                                   | Intended Surgery  | Medical Management | p-value |
|-----------------------------------|-------------------|--------------------|---------|
| <i>CXR</i> ‡                      |                   |                    |         |
| Normal                            | 873/2762 (31.6%)  | 61/322 (18.9%)     | <0.001  |
| Widening mediastinum              | 1073/2037(52.7%)  | 153/282 (54.3%)    | 0.618   |
| Abnormal aortic contour           | 812/1946(41.7%)   | 121/268 (45.1%)    | 0.287   |
| Displacement/calcification of ao. | 100/1894 (5.3%)   | 22/255 (8.6%)      | 0.030   |
| Pleural effusion > minor          | 217/1962 (11.1%)  | 54/267 (20.2%)     | <0.001  |
| <i>ECG</i>                        |                   |                    |         |
| Normal                            | 1437/3774 (38.1%) | 90/374 (24.1%)     | <0.001  |
| Ischemia                          | 439/2619 (16.8%)  | 48/312 (15.4%)     | 0.537   |
| Infarction, new Qs/ST elevation   | 264/2633 (10.0%)  | 23/310 (7.4%)      | 0.143   |
| Infarction, old Qs                | 137/2575 (5.3%)   | 33/310 (10.6%)     | <0.001  |
| Non-specific ST-T changes         | 1200/2695 (44.5%) | 166/321 (51.7%)    | 0.014   |
| LVH                               | 597/2631 (22.7%)  | 67/307 (21.8%)     | 0.731   |
| <i>Diagnostic imaging</i>         |                   |                    |         |
| True IMH#                         | 213/4382 (4.9%)   | 44/402 (10.9%)     | <0.001  |
| Site of most proximal extent      |                   |                    |         |
| Root                              | 2266/4017 (56.4%) | 180/376 (47.9%)    | 0.001   |
| STJ**                             | 439/4017 (10.9%)  | 31/376 (8.2%)      | 0.107   |
| Ascending                         | 1196/4017 (29.8%) | 132/376 (35.1%)    | 0.031   |
| Arch                              | 76/4017 (1.9%)    | 26/376 (6.9%)      | <0.001  |
| Site of most distal extent        |                   |                    |         |
| Ascending                         | 450/3472 (13.0%)  | 52/329 (15.8%)     | 0.145   |
| Arch                              | 620/3472(17.9%)   | 57/329 (17.3%)     | 0.810   |
| LSC††                             | 128/3472 (3.7%)   | 12/329 (3.6%)      | 0.971   |
| Descending                        | 731/3472 (21.1%)  | 77/329 (23.4%)     | 0.319   |
| Abdominal                         | 848/3472(24.4%)   | 99/329 (30.1%)     | 0.023   |
| False lumen thrombosis            |                   |                    |         |
| Patent                            | 1701/2359(72.1%)  | 117/236 (49.6%)    | <0.001  |
| Partial                           | 430/2359 (18.2%)  | 72/236 (30.5%)     | <0.001  |
| Complete                          | 228/2359 (9.7%)   | 47/236 (19.9%)     | <0.001  |

|                      |                   |                 |        |
|----------------------|-------------------|-----------------|--------|
| Site of intimal tear |                   |                 |        |
| Root                 | 279/2569 (10.9%)  | 9/247 (3.6%)    | <0.001 |
| Ascending            | 1311/2569 (51.0%) | 101/247 (40.9%) | 0.002  |
| Arch                 | 182/2569 (7.1%)   | 28/247 (11.3%)  | 0.015  |
| Descending           | 59/2569 (2.3%)    | 9/247 (3.6%)    | 0.188  |
| Vessel involvement   |                   |                 |        |
| Right renal          | 326/4516 (7.2%)   | 32/415 (7.7%)   | 0.712  |
| Left renal           | 541/4516(12.0%)   | 50/415 (12.0%)  | 0.967  |
| Celiac               | 200/464 (43.1%)   | 10/18 (55.6%)   | 0.296  |
| Mesenteric           | 250/474 (52.7%)   | 9/19 (47.4%)    | 0.646  |
| Complete abdominal   | 171/4516 (3.8%)   | 21/415 (5.1%)   | 0.199  |
| Arch                 | 1379/2809(47.4%)  | 118/304 (38.8%) | 0.004  |
| LSC                  | 352/583 (60.4%)   | 20/31 (64.5%)   | 0.646  |
| LCC‡‡                | 35/583 (59.2%)    | 18/31 (58.1%)   | 0.902  |
| Brachiocephalic      | 490/598 (81.9%)   | 25/32 (78.1%)   | 0.586  |
| Right coronary       | 138/923 (15.0%)   | 5/64 (7.8%)     | 0.117  |
| Left coronary        | 53/910 (5.8%)     | 1/63 (1.6%)     | 0.250  |
| Aortic regurgitation | 1674/3201 (55.4%) | 118/296 (39.9%) | <0.001 |
| Pericardial effusion | 1508/3355 (44.9%) | 140/359 (39.0%) | 0.031  |
| Periaortic hematoma  | 552/2787 (19.8%)  | 61/329 (18.5%)  | 0.585  |

§CXR: chest x-ray, ||LVH: left ventricular hypertrophy, #IMH: intramural hematoma, \*\*STJ: Sino tubular junction , ††LSC: left subclavian, ‡‡LCC: left common carotid

eTable 3. Key Differences Between Surgically Managed Patients and Those who Died Waiting

|                                | Surgical Management | Died Awaiting Surgery | p-value |
|--------------------------------|---------------------|-----------------------|---------|
| N= 5131                        | 5080 (99%)          | 51 (1%)               |         |
| Age (mean ± SD)                | 60.3±14.1           | 64.3±14.7             | 0.043   |
| Asian race                     | 216/4622 (4.7%)     | 4/45 (11.1%)          | .043    |
| Pulse deficits present         | 949/2749 (34.5%)    | 15/26 (57.7%)         | 0.014   |
| Coma/altered consciousness     | 384/4130 (9.3%)     | 11/40 (27.5%)         | <0.001  |
| EKG Ischemia                   | 430/2594 (16.6%)    | 9/25 (36.0%)          | 0.010   |
| Right renal involvement        | 316/4470 (7.1%)     | 10/46 (21.7%)         | <0.001  |
| Left renal involvement         | 530/4470 (11.9%)    | 11/46 (23.9%)         | 0.012   |
| Complete abdominal involvement | 163/4470 (3.6%)     | 8/46 (17.4%)          | <0.001  |
| Pre procedure complications    |                     |                       |         |
| Stroke                         | 183/4347 (4.2%)     | 5/28 (17.9%)          | <0.001  |
| Myocardial infarction          | 138/2094 (6.6%)     | 5/16 (31.3%)          | <0.001  |
| Mesenteric ischemia/infarction | 111/4406 (2.5%)     | 8/30 (26.7%)          | <0.001  |
| Acute renal failure            | 316/4406 (7.2%)     | 10/32 (31.3%)         | <0.001  |
| Hypotension                    | 860/4429 (19.4%)    | 25/37 (67.6%)         | <0.001  |
| Cardiac tamponade              | 556/4451 (12.5%)    | 13/33 (39.4%)         | <0.001  |
| Limb ischemia                  | 445/4416 (10.1%)    | 12/29 (41.4%)         | <0.001  |
| Time to death                  | 71 hours            | 8.9 hours             | -       |

eTable 4. Cox Proportional Hazard Analysis for Patients Who Died Awaiting Surgery

|                                     | Hazard Ratio | 95% Confidence Interval |        | p-value |
|-------------------------------------|--------------|-------------------------|--------|---------|
|                                     |              | Lower                   | Upper  |         |
| Presenting hypotension              | 18.74        | 2.12                    | 165.80 | 0.008   |
| Presenting shock                    | 14.17        | 1.24                    | 162.60 | 0.033   |
| Pre-procedure myocardial infarction | 11.25        | 2.69                    | 47.03  | 0.001   |
| Age                                 | 1.08         | 1.01                    | 1.15   | 0.031   |

eFigure 1. Survival Between Early and Later Years Separated by Management Type.

Part A. Kaplan-Meier analysis of 48 hour survival in surgical patients and patients who died awaiting surgery, first 11.5 years versus second 11.5 years of the registry.

Part B. Kaplan-Meier analysis of 48 hour survival in medically managed patients, first 11.5 years versus second 11.5 years of the registry.

**A. Patients with Surgery and Intended Surgery, 48 Hour Mortality by Time Period**

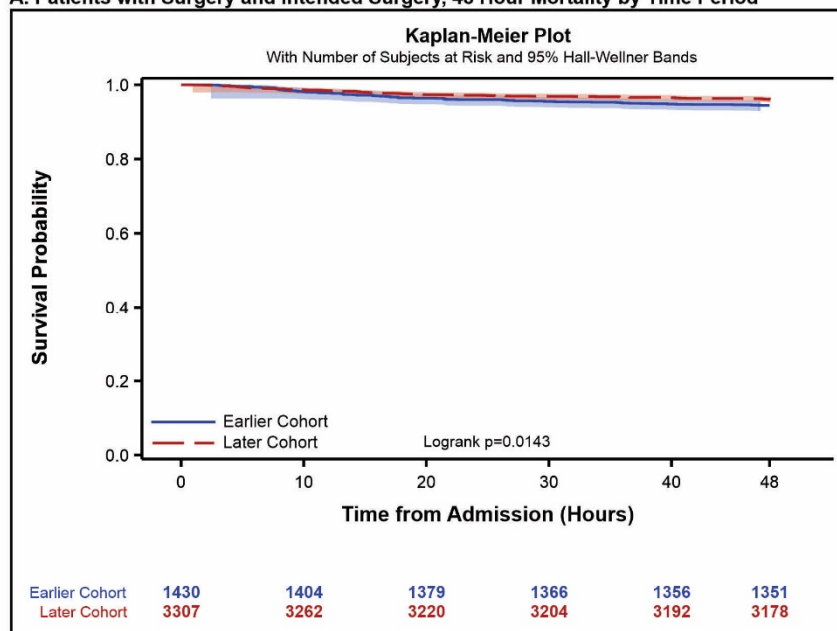

**B. Patients with Medical Management Alone, 48 Hour Mortality by Time Period**

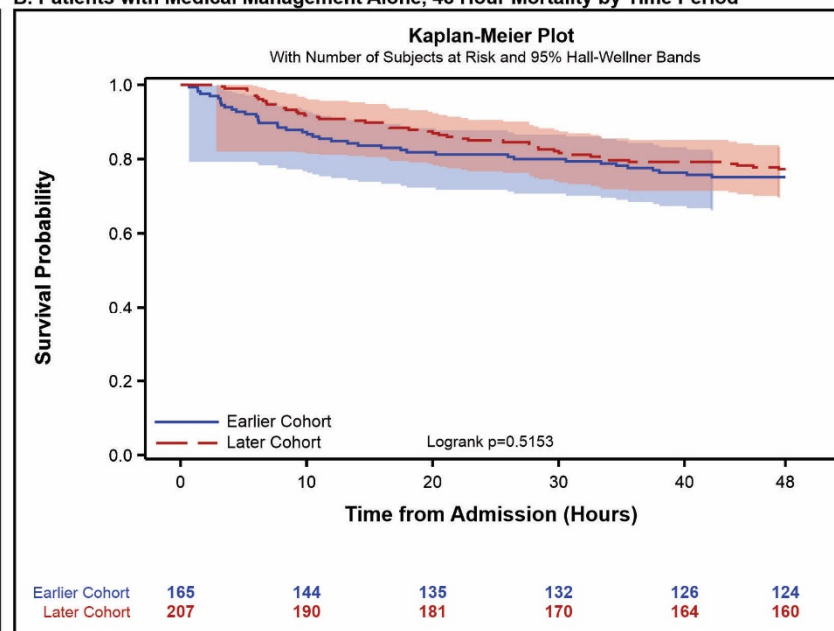

eFigure 2. Time to Surgery.

Cumulative Incidence of Surgery Over Time Within the First 48 Hours Following Admission Among Patients who Ultimately Received Surgery.

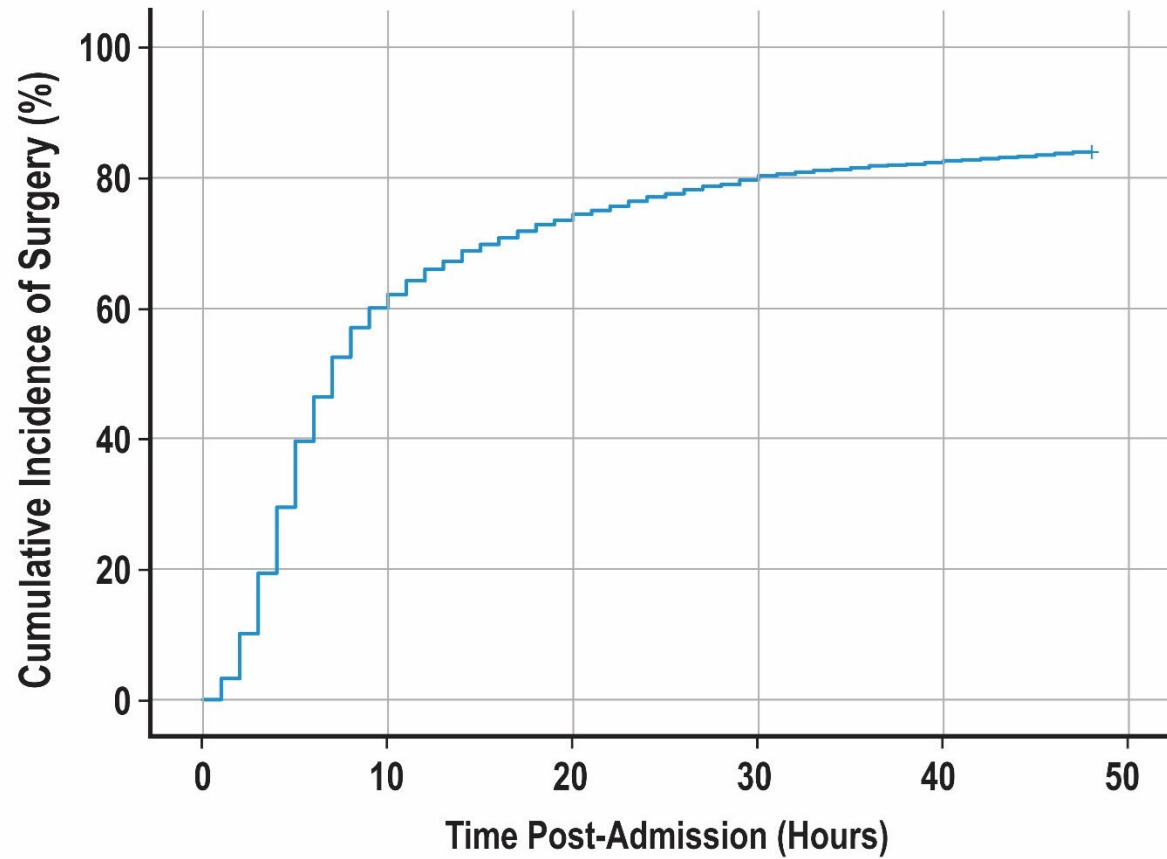

Supplement: jamacardiol-e222718-s001.pdf [file jamacardiol-e222718-s001.pdf]
